# Supplementary material for: Detection of surfactants using a hydrophobic natural deep eutectic solvent and smartphone
Source: Royal Society of Chemistry journal article supplement (doi:10.1039/d4sd00196f), 2024-01-01
Supplement: d4sd00196f1.pdf [file d4sd00196f1.pdf]

*Supplementary information for*

**Detection of Surfactants using a Hydrophobic Natural Deep  
Eutectic Solvent and Smartphone**

Vagner Bezerra dos Santos, Lucas B. Ayres, Helayne Santos de Sousa, Carlos D. Garcia, and Willian  
Toito Suarez

**Table of Contents**

|                                                                                                                                                  |   |
|--------------------------------------------------------------------------------------------------------------------------------------------------|---|
| Figure SI 1: Location of the sample collection points that correspond to the shore of Lake Hartwell or a city creek that feeds to the lake. .... | 2 |
| Table SI 1: Analysis of cations and anions as potential interferent for SDS analysis using a 1:100 ratio .....                                   | 2 |
| Table SI 2: Recovery data for water samples employing HNADES and DIB to detect SDS .....                                                         | 3 |
| Table SI 3: Surfactant concentration measured using DIB and UV-Vis spectrophotometry (reference).....                                            | 4 |

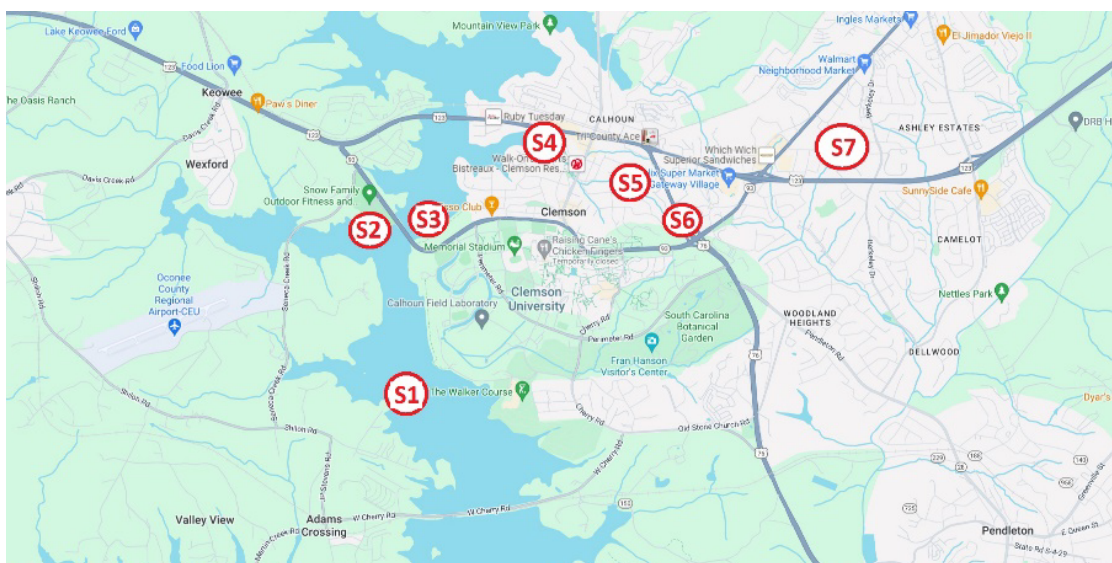

**Figure S1 1:** Location of the sample collection points that correspond to the shore of Lake Hartwell or a city creek that feeds to the lake. GPS coordinates: S1 (34.664131, -82.858203), S2 (34.681428, -82.865725), S3 (34.684385, -82.849207), S4 (34.690127, -82.837736), S5 (34.686904, -82.831580), S6 (34.686888, -82.831482) and S7 (34.682978, -82.811399).

**Table S1 1:** Analysis of cations and anions as potential interferent for SDS analysis using a 1:100 ratio (SDS: potential interferent). The value is the average for n = 3

| Cations and anions | RE (%) |
|--------------------|--------|
| Ca <sup>2+</sup>   | 6.10   |
| Na <sup>+</sup>    | 6.83   |
| Cu <sup>2+</sup>   | -6.98  |
| Ni <sup>2+</sup>   | 7.03   |
| Mg <sup>2+</sup>   | 0.48   |
| Fe <sup>3+</sup>   | 71.10  |
| Fe <sup>2+</sup>   | 13.78  |
| Al <sup>3+</sup>   | -1.31  |

|                               |       |
|-------------------------------|-------|
| Bi <sup>3+</sup>              | 5.23  |
| Cl <sup>-</sup>               | -1.81 |
| Br <sup>-</sup>               | 5.11  |
| PO <sub>4</sub> <sup>-3</sup> | -9.46 |

---

**Table SI 2:** Recovery data for water samples employing HNADES and DIB to detect SDS. Data obtained in triplicate (n = 3).

| Sample | Added (mg.L <sup>-1</sup> ) | Found (mg.L <sup>-1</sup> ) | Recovery (%) |
|--------|-----------------------------|-----------------------------|--------------|
| S1     | 0.160                       | 0.158 ± 0.009               | 98.5         |
|        | 0.350                       | 0.345 ± 0.007               | 98.5         |
| S2     | 0.160                       | 0.173 ± 0.009               | 108          |
|        | 0.350                       | 0.337 ± 0.005               | 96.2         |
| S3     | 0.160                       | 0.161 ± 0.009               | 101          |
|        | 0.350                       | 0.349 ± 0.009               | 99.6         |
| S4     | 0.160                       | 0.190 ± 0.009               | 119          |
|        | 0.350                       | 0.363 ± 0.009               | 104          |
| S5     | 0.160                       | 0.139 ± 0.009               | 86.6         |
|        | 0.350                       | 0.374 ± 0.008               | 107          |
| S6     | 0.160                       | 0.150 ± 0.009               | 93.8         |
|        | 0.350                       | 0.355 ± 0.009               | 101          |

|    |       |               |      |
|----|-------|---------------|------|
| S7 | 0.160 | 0.134 ± 0.007 | 83.6 |
|    | 0.350 | 0.339 ± 0.009 | 96.8 |

**Table SI 3:** Surfactant concentration measured using DIB and UV-Vis spectrophotometry (reference). Data with  $n = 3$ , F-tabled = 19.00 for  $n-1 = 2$ . T-tabled = 4.303 for  $n-1 = 2$ . Data for 95% confidence.

| Sample | Proposed Methodology<br>(mg.L <sup>-1</sup> ) | Spectrophotometry<br>(mg.L <sup>-1</sup> ) | Difference<br>(%) | F-test | T-test |
|--------|-----------------------------------------------|--------------------------------------------|-------------------|--------|--------|
| S1     | 0.101 ± 0.005                                 | 0.094 ± 0.001                              | 7.09              | 15.6   | 2.34   |
| S2     | 0.129 ± 0.003                                 | 0.140 ± 0.001                              | -7.86             | 18.5   | 3.74   |
| S3     | 0.140 ± 0.004                                 | 0.150 ± 0.001                              | -6.94             | 5.00   | 4.20   |
| S4     | 0.111 ± 0.002                                 | 0.122 ± 0.005                              | -9.06             | 4.90   | 0.92   |
| S5     | 0.111 ± 0.016                                 | 0.110 ± 0.042                              | 0.69              | 6.43   | 0.55   |
| S6     | 0.112 ± 0.002                                 | 0.120 ± 0.042                              | -6.58             | 3.37   | 0.52   |
| S7     | 0.107 ± 0.005                                 | 0.110 ± 0.001                              | -2.42             | 1.13   | 3.18   |
